# Supplementary material
Source: publisher site journal article supplement (https://www.dovepress.com/article/524638)
Supplement: Supplementary file 1 [file Supplemental%20Tables_1.pdf]

Supplemental Table 1. Opioid Use Comparisons in Knee Arthroscopy Patients

| <b>Knee arthroscopy patients (n=66)</b> |                  |                                       |                                        |                     |                      |
|-----------------------------------------|------------------|---------------------------------------|----------------------------------------|---------------------|----------------------|
|                                         |                  | <b>No<br/>Opioid<br/>Use<br/>N(%)</b> | <b>Any<br/>Opioid<br/>Use<br/>N(%)</b> | <b>P<br/>Value*</b> | <b>N<br/>missing</b> |
| <b>Total N</b>                          |                  | 17                                    | 49                                     |                     |                      |
| <b>Age</b>                              | <i>&lt;40</i>    | 4 (24%)                               | 26 (53%)                               | 0.04                | 0                    |
|                                         | <i>40-54</i>     | 4 (24%)                               | 12 (24%)                               |                     |                      |
|                                         | <i>55-69</i>     | 9 (53%)                               | 11 (22%)                               |                     |                      |
|                                         | <i>70+</i>       | 0 (0%)                                | 0 (0%)                                 |                     |                      |
| <b>Sex</b>                              | <i>Female</i>    | 5 (29%)                               | 29 (59%)                               | 0.05                | 0                    |
| <b>Race</b>                             | <i>Non-white</i> | 1 (6%)                                | 5 (10%)                                | 1                   | 0                    |
| <b>Ethnicity</b>                        | <i>Hispanic</i>  | 0 (0%)                                | 1 (2%)                                 | 1                   | 0                    |
| <b>Alcohol use</b>                      | <i>Yes</i>       | 8 (53%)                               | 25 (76%)                               | 0.18                | 18                   |
| <b>Tobacco use</b>                      | <i>Current</i>   | 2 (12%)                               | 4 (9%)                                 | 0.21                | 4                    |
|                                         | <i>Former</i>    | 2 (12%)                               | 15 (33%)                               |                     |                      |
|                                         | <i>Never</i>     | 13 (76%)                              | 26 (58%)                               |                     |                      |

|                                                               |                               |              |              |       |    |
|---------------------------------------------------------------|-------------------------------|--------------|--------------|-------|----|
|                                                               |                               |              |              |       |    |
| <b>Substance use</b>                                          | <i>Yes</i>                    | 0 (0%)       | 4 (13%)      | 0.3   | 23 |
|                                                               |                               |              |              |       |    |
| <b>Procedure type</b>                                         | <i>Urgent</i>                 | 0 (0%)       | 0 (0%)       | --    | 0  |
|                                                               | <i>Emergent</i>               | 0 (0%)       | 0 (0%)       |       |    |
|                                                               | <i>Elective</i>               | 17<br>(100%) | 49<br>(100%) |       |    |
|                                                               |                               |              |              |       |    |
| <b>Opioid prior (regular 7+ days before surgery)</b>          | <i>Yes</i>                    | 2 (12%)      | 1 (2%)       | 0.16  | 0  |
|                                                               |                               |              |              |       |    |
| <b>How well pain controlled since surgery</b>                 | <i>Very well controlled</i>   | 13 (76%)     | 18 (39%)     | 0.002 | 3  |
|                                                               | <i>Well controlled</i>        | 3 (18%)      | 28 (61%)     |       |    |
|                                                               | <i>Poorly controlled</i>      | 1 (6%)       | 0 (0%)       |       |    |
|                                                               | <i>Very poorly controlled</i> | 0 (0%)       | 0 (0%)       |       |    |
|                                                               |                               |              |              |       |    |
| <b>How satisfied with pain control since leaving hospital</b> | <i>Very satisfied</i>         | 14 (82%)     | 22 (47%)     | 0.005 | 2  |
|                                                               | <i>Satisfied</i>              | 2 (12%)      | 24 (51%)     |       |    |
|                                                               | <i>Unsatisfied</i>            | 0 (0%)       | 1 (2%)       |       |    |
|                                                               | <i>Very unsatisfied</i>       | 1 (6%)       | 0 (0%)       |       |    |
|                                                               |                               |              |              |       |    |
| <b>How satisfied with post-op care since leaving hospital</b> | <i>Very satisfied</i>         | 14 (82%)     | 24 (49%)     | 0.04  | 0  |
|                                                               | <i>Satisfied</i>              | 3 (18%)      | 24 (49%)     |       |    |
|                                                               | <i>Unsatisfied</i>            | 0 (0%)       | 1 (2%)       |       |    |
|                                                               | <i>Very unsatisfied</i>       | 0 (0%)       | 0 (0%)       |       |    |
|                                                               |                               |              |              |       |    |

|                                                                      |                           |           |           |      |    |
|----------------------------------------------------------------------|---------------------------|-----------|-----------|------|----|
| <b>Discuss expected pain pre-op</b>                                  | <i>No</i>                 | 1 (6%)    | 7 (14%)   | 0.41 | 0  |
|                                                                      | <i>Do not recall</i>      | 0 (0%)    | 3 (6%)    |      |    |
|                                                                      | <i>Yes</i>                | 16 (94%)  | 39 (80%)  |      |    |
|                                                                      |                           |           |           |      |    |
| <b>Discuss pain management pre-op</b>                                | <i>No</i>                 | 0 (0%)    | 6 (12%)   | 0.25 | 0  |
|                                                                      | <i>Do not recall</i>      | 0 (0%)    | 3 (6%)    |      |    |
|                                                                      | <i>Yes</i>                | 17 (100%) | 40 (82%)  |      |    |
|                                                                      |                           |           |           |      |    |
| <b>Actual pain compared to expected</b>                              | <i>More than expected</i> | 1 (6%)    | 16 (33%)  | 0.04 | 0  |
|                                                                      | <i>As expected</i>        | 4 (24%)   | 14 (29%)  |      |    |
|                                                                      | <i>Less than expected</i> | 12 (71%)  | 19 (39%)  |      |    |
|                                                                      |                           |           |           |      |    |
| <b>After surgery given instructions on nonopioid pain management</b> | <i>Yes</i>                | 17 (100%) | 49 (100%) | --   | 0  |
|                                                                      |                           |           |           |      |    |
| <b>Nonopioid med used</b>                                            | <i>Yes</i>                | 12 (86%)  | 38 (93%)  | 0.59 | 11 |
|                                                                      |                           |           |           |      |    |
| <b>Acetaminophen</b>                                                 | <i>Yes</i>                | 12 (71%)  | 37 (76%)  | 0.75 | 0  |
|                                                                      |                           |           |           |      |    |
| <b>Ibuprofen</b>                                                     | <i>Yes</i>                | 6 (35%)   | 28 (57%)  | 0.16 | 0  |
|                                                                      |                           |           |           |      |    |
| <b>Naproxen</b>                                                      | <i>Yes</i>                | 3 (18%)   | 2 (4%)    | 0.1  | 0  |
|                                                                      |                           |           |           |      |    |
| <b>Use walking or exercise</b>                                       | <i>Yes</i>                | 10 (77%)  | 38 (95%)  | 0.09 | 13 |
|                                                                      |                           |           |           |      |    |
| <b>Prescribed right amount</b>                                       | <i>Less than needed</i>   | 0 (0%)    | 8 (16%)   | 0.28 | 3  |

|                             |                              |          |           |      |   |
|-----------------------------|------------------------------|----------|-----------|------|---|
| <b>of pain pills</b>        | <i>Just the right amount</i> | 8 (57%)  | 21 (43%)  |      |   |
|                             | <i>More than needed</i>      | 6 (43%)  | 20 (41%)  |      |   |
|                             |                              |          |           |      |   |
| <b>Prescription = "PRN"</b> | <i>Yes</i>                   | 15 (94%) | 49 (100%) | 0.25 | 1 |

\* Fisher's exact test

Supplemental Table 2. Opioid Use Comparisons in Carpal Tunnel Release Patients

|                                                  |                  | <b>No Opioid Use<br/>N(%)</b> | <b>Any Opioid Use<br/>N(%)</b> | <b>P Value*</b> | <b>N missing</b> |
|--------------------------------------------------|------------------|-------------------------------|--------------------------------|-----------------|------------------|
| <b>Carpal tunnel release patients<br/>(n=32)</b> |                  |                               |                                |                 |                  |
|                                                  |                  |                               |                                |                 |                  |
| <b>Total N</b>                                   |                  | 26                            | 6                              |                 |                  |
|                                                  |                  |                               |                                |                 |                  |
| <b>Age</b>                                       | <i>&lt;40</i>    | 0 (0%)                        | 1 (17%)                        | 0.05            | 0                |
|                                                  | <i>40-54</i>     | 8 (31%)                       | 4 (67%)                        |                 |                  |
|                                                  | <i>55-69</i>     | 13 (50%)                      | 1 (17%)                        |                 |                  |
|                                                  | <i>70+</i>       | 5 (19%)                       | 0 (0%)                         |                 |                  |
|                                                  |                  |                               |                                |                 |                  |
| <b>Sex</b>                                       | <i>Female</i>    | 15 (58%)                      | 3 (50%)                        | 1               | 0                |
|                                                  |                  |                               |                                |                 |                  |
| <b>Race</b>                                      | <i>Non-white</i> | 2 (8%)                        | 1 (17%)                        | 0.48            | 0                |

|                                                      |                               |              |             |      |   |
|------------------------------------------------------|-------------------------------|--------------|-------------|------|---|
|                                                      |                               |              |             |      |   |
| <b>Ethnicity</b>                                     | <i>Hispanic</i>               | 0 (0%)       | 1 (17%)     | 0.19 | 0 |
|                                                      |                               |              |             |      |   |
| <b>Alcohol use</b>                                   | <i>Yes</i>                    | 13 (54%)     | 4 (67%)     | 0.67 | 2 |
|                                                      |                               |              |             |      |   |
| <b>Tobacco use</b>                                   | <i>Current</i>                | 1 (4%)       | 2 (33%)     | 0.11 | 0 |
|                                                      | <i>Former</i>                 | 12 (46%)     | 2 (33%)     |      |   |
|                                                      | <i>Never</i>                  | 13 (50%)     | 2 (33%)     |      |   |
|                                                      |                               |              |             |      |   |
| <b>Substance use</b>                                 | <i>Yes</i>                    | 1 (4%)       | 1 (17%)     | 0.37 | 2 |
|                                                      |                               |              |             |      |   |
| <b>Procedure type</b>                                | <i>Urgent</i>                 | 0 (0%)       | 0 (0%)      | --   | 0 |
|                                                      | <i>Emergent</i>               | 0 (0%)       | 0 (0%)      |      |   |
|                                                      | <i>Elective</i>               | 26<br>(100%) | 6<br>(100%) |      |   |
|                                                      |                               |              |             |      |   |
| <b>Opioid prior (regular 7+ days before surgery)</b> | <i>Yes</i>                    | 1 (4%)       | 0 (0%)      | 1    | 0 |
|                                                      |                               |              |             |      |   |
| <b>How well pain controlled since surgery</b>        | <i>Very well controlled</i>   | 19 (73%)     | 4 (80%)     | 1    | 1 |
|                                                      | <i>Well controlled</i>        | 7 (27%)      | 1 (20%)     |      |   |
|                                                      | <i>Poorly controlled</i>      | 0 (0%)       | 0 (0%)      |      |   |
|                                                      | <i>Very poorly controlled</i> | 0 (0%)       | 0 (0%)      |      |   |
|                                                      |                               |              |             |      |   |
| <b>How satisfied with pain control since leaving</b> | <i>Very satisfied</i>         | 20 (77%)     | 4 (67%)     | 0.62 | 0 |
|                                                      | <i>Satisfied</i>              | 6 (23%)      | 2 (33%)     |      |   |

|                                                                  |                           |          |          |      |    |
|------------------------------------------------------------------|---------------------------|----------|----------|------|----|
| <b>hospital</b>                                                  | <i>Unsatisfied</i>        | 0 (0%)   | 0 (0%)   |      |    |
|                                                                  | <i>Very unsatisfied</i>   | 0 (0%)   | 0 (0%)   |      |    |
|                                                                  |                           |          |          |      |    |
| <b>How satisfied with post-op care since leaving hospital</b>    | <i>Very satisfied</i>     | 15 (58%) | 4 (67%)  | 1    | 0  |
|                                                                  | <i>Satisfied</i>          | 11 (42%) | 2 (33%)  |      |    |
|                                                                  | <i>Unsatisfied</i>        | 0 (0%)   | 0 (0%)   |      |    |
|                                                                  | <i>Very unsatisfied</i>   | 0 (0%)   | 0 (0%)   |      |    |
|                                                                  |                           |          |          |      |    |
| <b>Discuss expected pain pre-op</b>                              | <i>No</i>                 | 10 (38%) | 1 (17%)  | 0.5  | 0  |
|                                                                  | <i>Do not recall</i>      | 1 (4%)   | 0 (0%)   |      |    |
|                                                                  | <i>Yes</i>                | 15 (58%) | 5 (83%)  |      |    |
|                                                                  |                           |          |          |      |    |
| <b>Discuss pain management pre-op</b>                            | <i>No</i>                 | 2 (8%)   | 1 (17%)  | 0.58 | 0  |
|                                                                  | <i>Do not recall</i>      | 1 (4%)   | 0 (0%)   |      |    |
|                                                                  | <i>Yes</i>                | 23 (88%) | 5 (83%)  |      |    |
|                                                                  |                           |          |          |      |    |
| <b>Actual pain compared to expected</b>                          | <i>More than expected</i> | 0 (0%)   | 2 (33%)  | 0.06 | 2  |
|                                                                  | <i>As expected</i>        | 12 (50%) | 2 (33%)  |      |    |
|                                                                  | <i>Less than expected</i> | 12 (50%) | 2 (33%)  |      |    |
|                                                                  |                           |          |          |      |    |
| <b>After surgery given instructions on nonopioid pain manage</b> | <i>Yes</i>                | 25 (96%) | 6 (100%) | 1    | 0  |
|                                                                  |                           |          |          |      |    |
|                                                                  |                           |          |          |      |    |
| <b>Nonopioid med used</b>                                        | <i>Yes</i>                | 12 (92%) | 5 (100%) | 1    | 14 |
|                                                                  |                           |          |          |      |    |
|                                                                  |                           |          |          |      |    |

|                                              |                              |          |          |      |    |
|----------------------------------------------|------------------------------|----------|----------|------|----|
| <b>Acetaminophen</b>                         | <i>Yes</i>                   | 10 (38%) | 2 (33%)  | 1    | 0  |
|                                              |                              |          |          |      |    |
| <b>Ibuprofen</b>                             | <i>Yes</i>                   | 9 (35%)  | 4 (67%)  | 0.19 | 0  |
|                                              |                              |          |          |      |    |
| <b>Naproxen</b>                              | <i>Yes</i>                   | 0 (0%)   | 1 (17%)  | 0.19 | 0  |
|                                              |                              |          |          |      |    |
| <b>Use walking or exercise</b>               | <i>Yes</i>                   | 7 (70%)  | 3 (75%)  | 1    | 18 |
|                                              |                              |          |          |      |    |
| <b>Prescribed right amount of pain pills</b> | <i>Less than needed</i>      | 0 (0%)   | 2 (33%)  | 0.54 | 22 |
|                                              | <i>Just the right amount</i> | 2 (50%)  | 2 (33%)  |      |    |
|                                              | <i>More than needed</i>      | 2 (50%)  | 2 (33%)  |      |    |
|                                              |                              |          |          |      |    |
| <b>Prescription = "PRN"</b>                  | <i>Yes</i>                   | 5 (100%) | 6 (100%) | --   | 21 |

\* Fisher's exact test

Supplemental Table 3. Opioid Use Comparisons in Shoulder Arthroscopy Patients

| <b>Shoulder arthroscopy patients (n=61)</b> |  |                           |                            |                 |                  |
|---------------------------------------------|--|---------------------------|----------------------------|-----------------|------------------|
|                                             |  |                           |                            |                 |                  |
|                                             |  | <b>No Opioid Use N(%)</b> | <b>Any Opioid Use N(%)</b> | <b>P Value*</b> | <b>N missing</b> |
|                                             |  |                           |                            |                 |                  |
| <b>Total N</b>                              |  | 7                         | 54                         |                 |                  |

|                                                      |                  |             |              |      |    |
|------------------------------------------------------|------------------|-------------|--------------|------|----|
|                                                      |                  |             |              |      |    |
| <b>Age</b>                                           | <i>&lt;40</i>    | 1 (14%)     | 3 (6%)       | 0.19 | 0  |
|                                                      | <i>40-54</i>     | 4 (57%)     | 15 (28%)     |      |    |
|                                                      | <i>55-69</i>     | 1 (14%)     | 25 (46%)     |      |    |
|                                                      | <i>70+</i>       | 1 (14%)     | 11 (20%)     |      |    |
|                                                      |                  |             |              |      |    |
| <b>Sex</b>                                           | <i>Female</i>    | 3 (43%)     | 19 (35%)     | 0.7  | 0  |
|                                                      |                  |             |              |      |    |
| <b>Race</b>                                          | <i>Non-white</i> | 0 (0%)      | 2 (4%)       | 1    | 0  |
|                                                      |                  |             |              |      |    |
| <b>Ethnicity</b>                                     | <i>Hispanic</i>  | 0 (0%)      | 0 (0%)       | --   | 0  |
|                                                      |                  |             |              |      |    |
| <b>Alcohol use</b>                                   | <i>Yes</i>       | 2 (33%)     | 34 (72%)     | 0.08 | 8  |
|                                                      |                  |             |              |      |    |
| <b>Tobacco use</b>                                   | <i>Current</i>   | 0 (0%)      | 7 (13%)      | 0.86 | 0  |
|                                                      | <i>Former</i>    | 3 (43%)     | 23 (43%)     |      |    |
|                                                      | <i>Never</i>     | 4 (57%)     | 24 (44%)     |      |    |
|                                                      |                  |             |              |      |    |
| <b>Substance use</b>                                 | <i>Yes</i>       | 1 (14%)     | 6 (14%)      | 1    | 11 |
|                                                      |                  |             |              |      |    |
| <b>Procedure type</b>                                | <i>Urgent</i>    | 0 (0%)      | 0 (0%)       | --   | 0  |
|                                                      | <i>Emergent</i>  | 0 (0%)      | 0 (0%)       |      |    |
|                                                      | <i>Elective</i>  | 7<br>(100%) | 54<br>(100%) |      |    |
|                                                      |                  |             |              |      |    |
| <b>Opioid prior (regular 7+ days before surgery)</b> | <i>Yes</i>       | 0 (0%)      | 4 (7%)       | 1    | 0  |

|                                                               |                               |          |          |      |   |
|---------------------------------------------------------------|-------------------------------|----------|----------|------|---|
|                                                               |                               |          |          |      |   |
| <b>How well pain controlled since surgery</b>                 | <i>Very well controlled</i>   | 6 (86%)  | 26 (50%) | 0.25 | 2 |
|                                                               | <i>Well controlled</i>        | 1 (14%)  | 24 (46%) |      |   |
|                                                               | <i>Poorly controlled</i>      | 0 (0%)   | 2 (4%)   |      |   |
|                                                               | <i>Very poorly controlled</i> | 0 (0%)   | 0 (0%)   |      |   |
|                                                               |                               |          |          |      |   |
| <b>How satisfied with pain control since leaving hospital</b> | <i>Very satisfied</i>         | 5 (71%)  | 29 (56%) | 0.76 | 2 |
|                                                               | <i>Satisfied</i>              | 2 (29%)  | 21 (40%) |      |   |
|                                                               | <i>Unsatisfied</i>            | 0 (0%)   | 2 (4%)   |      |   |
|                                                               | <i>Very unsatisfied</i>       | 0 (0%)   | 0 (0%)   |      |   |
|                                                               |                               |          |          |      |   |
| <b>How satisfied with post-op care since leaving hospital</b> | <i>Very satisfied</i>         | 4 (57%)  | 30 (57%) | 0.15 | 1 |
|                                                               | <i>Satisfied</i>              | 2 (29%)  | 23 (43%) |      |   |
|                                                               | <i>Unsatisfied</i>            | 1 (14%)  | 0 (0%)   |      |   |
|                                                               | <i>Very unsatisfied</i>       | 0 (0%)   | 0 (0%)   |      |   |
|                                                               |                               |          |          |      |   |
| <b>Discuss expected pain pre-op</b>                           | <i>No</i>                     | 0 (0%)   | 3 (6%)   | 0.65 | 0 |
|                                                               | <i>Do not recall</i>          | 1 (14%)  | 4 (7%)   |      |   |
|                                                               | <i>Yes</i>                    | 6 (86%)  | 47 (87%) |      |   |
|                                                               |                               |          |          |      |   |
| <b>Discuss pain management pre-op</b>                         | <i>No</i>                     | 0 (0%)   | 1 (2%)   | 1    | 0 |
|                                                               | <i>Do not recall</i>          | 0 (0%)   | 0 (0%)   |      |   |
|                                                               | <i>Yes</i>                    | 7 (100%) | 53 (98%) |      |   |
|                                                               |                               |          |          |      |   |
| <b>Actual pain compared to</b>                                | <i>More than expected</i>     | 0 (0%)   | 10 (19%) | 0.57 | 1 |

|                                                                  |                              |          |           |      |    |
|------------------------------------------------------------------|------------------------------|----------|-----------|------|----|
| <b>expected</b>                                                  | <i>As expected</i>           | 2 (29%)  | 19 (36%)  |      |    |
|                                                                  | <i>Less than expected</i>    | 5 (71%)  | 24 (45%)  |      |    |
|                                                                  |                              |          |           |      |    |
| <b>After surgery given instructions on nonopioid pain manage</b> | <i>Yes</i>                   | 7 (100%) | 54 (100%) | --   | 0  |
|                                                                  |                              |          |           |      |    |
| <b>Nonopioid med used</b>                                        | <i>Yes</i>                   | 6 (100%) | 40 (95%)  | 1    | 13 |
|                                                                  |                              |          |           |      |    |
| <b>Acetaminophen</b>                                             | <i>Yes</i>                   | 6 (86%)  | 39 (72%)  | 0.66 | 0  |
|                                                                  |                              |          |           |      |    |
| <b>Ibuprofen</b>                                                 | <i>Yes</i>                   | 2 (29%)  | 9 (17%)   | 0.6  | 0  |
|                                                                  |                              |          |           |      |    |
| <b>Naproxen</b>                                                  | <i>Yes</i>                   | 0 (0%)   | 1 (2%)    | 1    | 0  |
|                                                                  |                              |          |           |      |    |
| <b>Use walking or exercise</b>                                   | <i>Yes</i>                   | 6 (100%) | 26 (68%)  | 0.17 | 17 |
|                                                                  |                              |          |           |      |    |
| <b>Prescribed right amount of pain pills</b>                     | <i>Less than needed</i>      | 0 (0%)   | 6 (12%)   | 1    | 2  |
|                                                                  | <i>Just the right amount</i> | 4 (57%)  | 26 (50%)  |      |    |
|                                                                  | <i>More than needed</i>      | 3 (43%)  | 29 (38%)  |      |    |
|                                                                  |                              |          |           |      |    |
| <b>Prescription = "PRN"</b>                                      | <i>Yes</i>                   | 5 (100%) | 53 (100%) | --   | 3  |

\* Fisher's exact test
